# Supplementary material for: Effects of Different Dietary Interventions on Calcitriol, Parathyroid Hormone, Calcium, and Phosphorus: Results from the DASH Trial
Source: Nutrients. 2018 Mar 17;10(3):367. doi: 10.3390/nu10030367 (PMC5872785; doi:10.3390/nu10030367)
Supplement: Supplementary file 1 [file nutrients-10-00367-s001.pdf]

Supplemental Materials: 3 Tables, 2 Figures.

| <b>SUPPLEMENTAL TABLE 1: NUTRIENT TARGETS, MENU ANALYSES, AND AVERAGE DAILY SERVINGS OF FOODS, ACCORDING TO DIET. *</b> |                     |          |                                    |          |                         |          |
|-------------------------------------------------------------------------------------------------------------------------|---------------------|----------|------------------------------------|----------|-------------------------|----------|
| <b>Item</b>                                                                                                             | <b>Control Diet</b> |          | <b>Fruits &amp; Vegetable Diet</b> |          | <b>Combination Diet</b> |          |
|                                                                                                                         | NUTRIENT            | MENU     | NUTRIENT                           | MENU     | NUTRIENT                | MENU     |
|                                                                                                                         | TARGET              | ANALYSIS | TARGET                             | ANALYSIS | TARGET                  | ANALYSIS |
| <b>Nutrients</b>                                                                                                        |                     |          |                                    |          |                         |          |
| Fat (% of total kcal)                                                                                                   | 37                  | 35.7     | 37                                 | 35.7     | 27                      | 25.6     |
| Saturated                                                                                                               | 16                  | 14.1     | 16                                 | 12.7     | 6                       | 7        |
| Monounsaturated                                                                                                         | 13                  | 12.4     | 13                                 | 13.9     | 13                      | 9.9      |
| Polyunsaturated                                                                                                         | 8                   | 6.2      | 8                                  | 7.3      | 8                       | 6.8      |
| Carbohydrates (% of total kcal)                                                                                         | 48                  | 50.5     | 48                                 | 49.2     | 55                      | 56.5     |
| Protein (% of total kcal)                                                                                               | 15                  | 13.8     | 15                                 | 15.1     | 18                      | 17.9     |
| Cholesterol (mg/day)                                                                                                    | 300                 | 233      | 300                                | 184      | 150                     | 151      |
| Fiber (g/day)                                                                                                           | 9                   | NA       | 31                                 | NA       | 31                      | NA       |
| Potassium (mg/day)                                                                                                      | 1700                | 1752     | 4700                               | 4101     | 4700                    | 4415     |
| Magnesium (mg/day)                                                                                                      | 165                 | 176      | 500                                | 423      | 500                     | 480      |
| Calcium (mg/day)                                                                                                        | 450                 | 443      | 450                                | 534      | 1240                    | 1265     |
| Sodium (mg/day)                                                                                                         | 3000                | 3028     | 3000                               | 2816     | 3000                    | 2859     |
| <b>Food groups (no. of servings/day)</b>                                                                                |                     |          |                                    |          |                         |          |
| Fruits and juices                                                                                                       | 1.6                 |          | 5.2                                |          | 5.2                     |          |
| Vegetables                                                                                                              | 2                   |          | 3.3                                |          | 4.4                     |          |
| Grains                                                                                                                  | 8.2                 |          | 6.9                                |          | 7.5                     |          |
| Low-fat dairy                                                                                                           | 0.1                 |          | 0                                  |          | 2                       |          |
| Regular-fat dairy                                                                                                       | 0.4                 |          | 0.3                                |          | 0.7                     |          |
| Nuts, seeds, and legumes                                                                                                | 0                   |          | 0.6                                |          | 0.7                     |          |
| Beef, pork, and ham                                                                                                     | 1.5                 |          | 1.8                                |          | 0.5                     |          |
| Poultry                                                                                                                 | 0.8                 |          | 0.4                                |          | 0.6                     |          |
| Fish                                                                                                                    | 0.2                 |          | 0.3                                |          | 0.5                     |          |
| Fat, oils, and salad dressing                                                                                           | 5.8                 |          | 5.3                                |          | 2.5                     |          |
| Snacks and sweets                                                                                                       | 4.1                 |          | 1.4                                |          | 0.7                     |          |

\* Values are for diets designed to provide an energy level of 2100 kcal Values are for diets designed to provide an energy level of 2100 kcal

**SUPPLEMENTAL TABLE 2: MISSING DATA BY CLINICAL CENTER**

|                                        | <b>Missing data</b> |           |             |        |        |
|----------------------------------------|---------------------|-----------|-------------|--------|--------|
|                                        | All                 | Baltimore | Baton Rouge | Boston | Durham |
|                                        | N=459               | n=92      | n=114       | n=124  | n=129  |
| <b>Parameters (Before)</b>             |                     |           |             |        |        |
| 24h Urinary Phosphate (mg/24h)         | 101                 | 10        | 32          | 43     | 16     |
| 24h Urinary Calcium (mg/24h)           | 72                  | 3         | 28          | 31     | 10     |
| PTH (pg/ml)                            | 6                   | 1         | 0           | 4      | 1      |
| Ionized Calcium (mg/dl)                | 5                   | 1         | 0           | 4      | 0      |
| Calcitriol (pg/ml)                     | 7                   | 1         | 0           | 6      | 0      |
| <b>Parameters (After)</b>              |                     |           |             |        |        |
| 24h Urinary Phosphorus (mg/24h)        | 93                  | 11        | 30          | 43     | 9      |
| 24h Urinary Calcium (mg/24h)           | 59                  | 5         | 29          | 17     | 8      |
| PTH (pg/ml)                            | 33                  | 1         | 4           | 25     | 3      |
| Ionized Calcium (mg/dl)                | 33                  | 1         | 4           | 25     | 3      |
| Calcitriol (pg/ml)                     | 37                  | 4         | 4           | 26     | 3      |
| <b>Missing one or more mean change</b> | 125                 | 14        | 41          | 49     | 21     |

**SUPPLEMENTAL TABLE 3. COMPARISONS OF MEAN CHANGES IN CALCITRIOL, PARATHYROID HORMONE, AND URINARY EXCRETION OF CALCIUM BETWEEN DIETS BY RACE AND SEX.**

| Markers                         | Change in DASH Diet Minus Change in Control Diet |                 |       |                       | Change in F & V Diet Minus Change in Control Diet |                  |        |                       | Change in DASH Diet Minus Change in F&V Diet |                  |       |                       |
|---------------------------------|--------------------------------------------------|-----------------|-------|-----------------------|---------------------------------------------------|------------------|--------|-----------------------|----------------------------------------------|------------------|-------|-----------------------|
|                                 | $\Delta$ - $\Delta$                              | (95 CI)         | P     | Adjusted P $\ddagger$ | $\Delta$ - $\Delta$                               | (95 CI)          | P      | Adjusted P $\ddagger$ | $\Delta$ - $\Delta$                          | (95 CI)          | P     | Adjusted P $\ddagger$ |
| <b>CALCITRIOL (pg/ml)</b>       |                                                  |                 |       |                       |                                                   |                  |        |                       |                                              |                  |       |                       |
| <b>Black women</b>              | -2.89                                            | (-6.43, 0.65)   | 0.108 | 0.432                 | 0.54                                              | (-3.10, 4.18)    | 0.769  | 1.000                 | -3.43                                        | (-6.98, 0.11)    | 0.057 | 0.228                 |
| <b>Black men</b>                | -6.94                                            | (-11.50, -2.37) | 0.006 | 0.024                 | -6.32                                             | (-10.76, -1.88)  | 0.006  | 0.024                 | -0.61                                        | (-5.13, 3.91)    | 0.789 | 1.000                 |
| <b>non-Black women</b>          | -2.41                                            | (-12.54, 7.72)  | 0.633 | 1.000                 | 4.74                                              | (-5.58, 15.05)   | 0.358  | 1.000                 | -7.15                                        | (-16.18, 1.88)   | 0.117 | 0.468                 |
| <b>non-Black men</b>            | -0.65                                            | (-4.11, 2.80)   | 0.708 | 1.000                 | 0.26                                              | (-3.16, 3.69)    | 0.878  | 1.000                 | -0.91                                        | (-4.44, 2.61)    | 0.607 | 1.000                 |
| <b>PTH (pg/ml)</b>              |                                                  |                 |       |                       |                                                   |                  |        |                       |                                              |                  |       |                       |
| <b>Black women</b>              | 0.42                                             | (-6.99, 7.84)   | 0.910 | 1.000                 | 1.05                                              | (-6.57, 8.67)    | 0.785  | 1.000                 | -0.62                                        | (-8.05, 6.80)    | 0.867 | 1.000                 |
| <b>Black men</b>                | -4.07                                            | (-10.33, 2.18)  | 0.198 | 0.792                 | 1.36                                              | (-4.72, 7.45)    | 0.656  | 1.000                 | -5.44                                        | (-11.63, 0.75)   | 0.084 | 0.336                 |
| <b>non-Black women</b>          | -0.72                                            | (-17.41, 15.97) | 0.931 | 1.000                 | 9.46                                              | (-7.53, 26.45)   | 0.267  | 1.000                 | -10.17                                       | (-25.05, 4.70)   | 0.174 | 0.696                 |
| <b>non-Black men</b>            | 2.76                                             | (-3.52, 9.04)   | 0.385 | 1.000                 | 3.45                                              | (-2.77, 9.68)    | 0.274  | 1.000                 | -0.69                                        | (-7.10, 5.71)    | 0.831 | 1.000                 |
| <b>Urinary Calcium (mg/24h)</b> |                                                  |                 |       |                       |                                                   |                  |        |                       |                                              |                  |       |                       |
| <b>Black women</b>              | -17.60                                           | (-40.48, 5.27)  | 0.130 | 0.520                 | -56.19                                            | (-79.68, -32.69) | <0.001 | 0.004                 | 38.58                                        | (15.69, 61.48)   | 0.001 | 0.004                 |
| <b>Black men</b>                | 27.06                                            | (-14.85, 68.98) | 0.202 | 0.808                 | -14.87                                            | (-55.66, 25.91)  | 0.470  | 1.000                 | 41.94                                        | (0.44, 83.43)    | 0.048 | 0.192                 |
| <b>non-Black women</b>          | 5.29                                             | (-68.12, 78.70) | 0.885 | 1.000                 | -46.06                                            | (-120.79, 28.68) | 0.220  | 0.880                 | 51.35                                        | (-14.09, 116.78) | 0.120 | 0.480                 |
| <b>non-Black men</b>            | 5.29                                             | (-29.03, 39.62) | 0.760 | 1.000                 | -43.52                                            | (-77.55, -9.48)  | 0.013  | 0.052                 | 48.81                                        | (13.80, 83.82)   | 0.007 | 0.028                 |

$\ddagger$  Multiple comparisons adjusted P-Value (Bonferroni correction)

**Figure S1: CONSORT Chart**

CONSORT Flow Diagram for DASH Trial

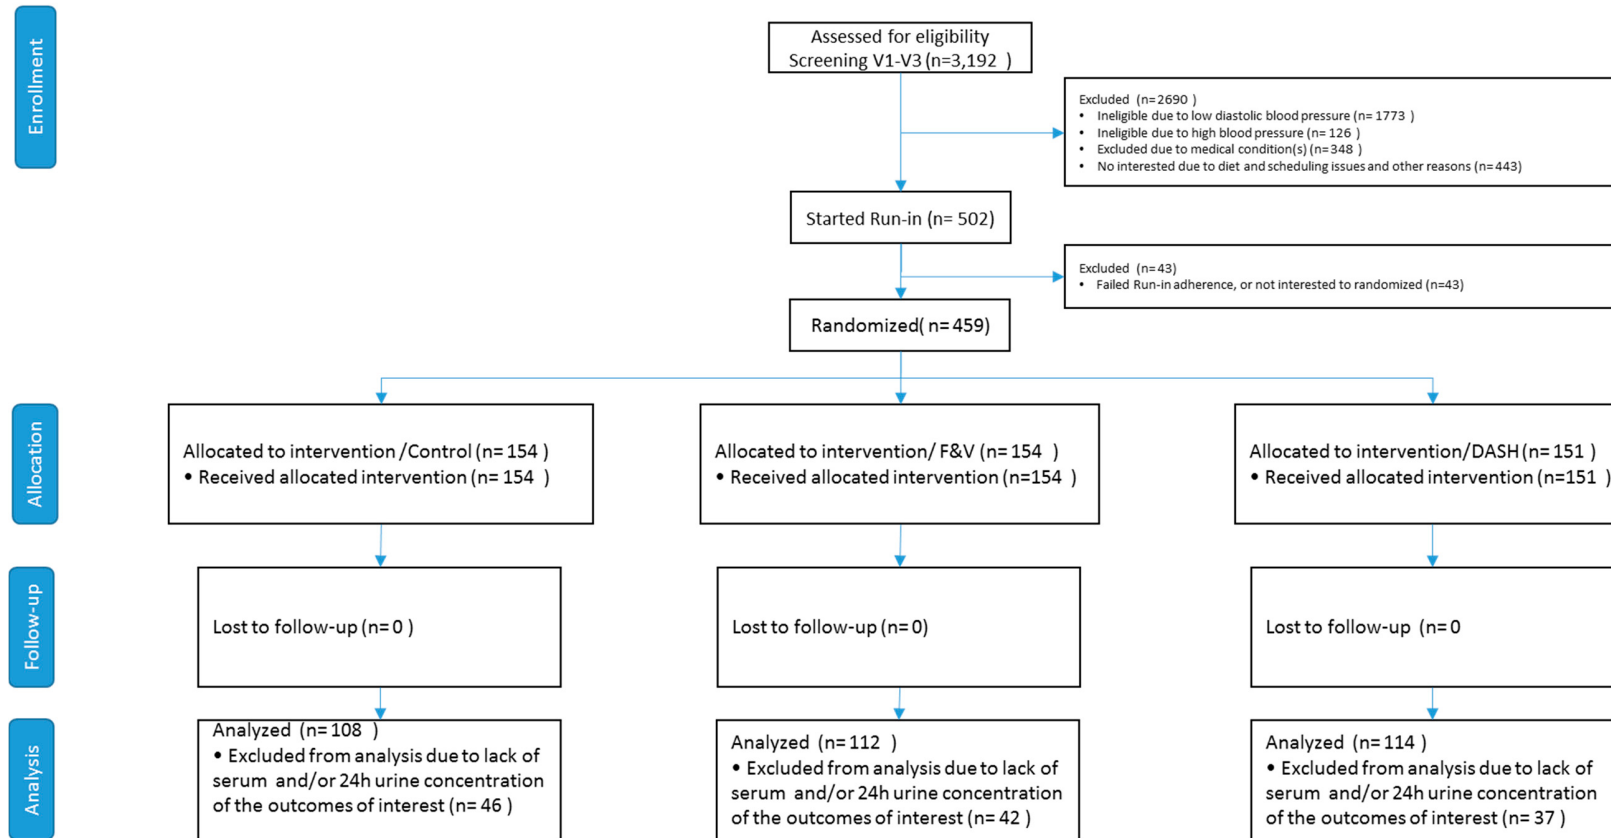

\*Appel LJ, Vollmer WM, Obarzanek E, Aicher KM, Conlin PR, Kennedy BM, Charleston JB, Reams PM. Recruitment and baseline characteristics of participants in the Dietary Approaches to Stop Hypertension trial. DASH Collaborative Research Group. J Am Diet Assoc. 1999 Aug;99(8 Suppl):S69-75.

**Figure S2: CONSORT 2010 Checklist of Randomized Trial\***

| Section/Topic                    | Item No | Checklist item                                                                                                                                                                              | Reported on page No |
|----------------------------------|---------|---------------------------------------------------------------------------------------------------------------------------------------------------------------------------------------------|---------------------|
| <b>Title and abstract</b>        |         |                                                                                                                                                                                             |                     |
|                                  | 1a      | Identification as a randomized trial in the title                                                                                                                                           | 1                   |
|                                  | 1b      | Structured summary of trial design, methods, results, and conclusions (for specific guidance see CONSORT for abstracts)                                                                     | 3                   |
| <b>Introduction</b>              |         |                                                                                                                                                                                             |                     |
| Background and objectives        | 2a      | Scientific background and explanation of rationale                                                                                                                                          | 4                   |
|                                  | 2b      | Specific objectives or hypotheses                                                                                                                                                           | 4-5                 |
| <b>Methods</b>                   |         |                                                                                                                                                                                             |                     |
| Trial design                     | 3a      | Description of trial design (such as parallel, factorial) including allocation ratio                                                                                                        | 5                   |
|                                  | 3b      | Important changes to methods after trial commencement (such as eligibility criteria), with reasons                                                                                          | 5                   |
| Participants                     | 4a      | Eligibility criteria for participants                                                                                                                                                       | 5                   |
|                                  | 4b      | Settings and locations where the data were collected                                                                                                                                        | 5-6                 |
| Interventions                    | 5       | The interventions for each group with sufficient details to allow replication, including how and when they were actually administered                                                       | 5                   |
| Outcomes                         | 6a      | Completely defined pre-specified primary and secondary outcome measures, including how and when they were assessed                                                                          | 6                   |
|                                  | 6b      | Any changes to trial outcomes after the trial commenced, with reasons                                                                                                                       | N/A                 |
| Sample size                      | 7a      | How sample size was determined                                                                                                                                                              | 6-7                 |
|                                  | 7b      | When applicable, explanation of any interim analyses and stopping guidelines                                                                                                                | N/A                 |
| Randomization:                   |         |                                                                                                                                                                                             |                     |
| Sequence generation              | 8a      | Method used to generate the random allocation sequence                                                                                                                                      | 5<br>(reference 14) |
|                                  | 8b      | Type of randomization; details of any restriction (such as blocking and block size)                                                                                                         | 5<br>(reference 14) |
| Allocation concealment mechanism | 9       | Mechanism used to implement the random allocation sequence (such as sequentially numbered containers), describing any steps taken to conceal the sequence until interventions were assigned | 5<br>(reference 14) |
| Implementation                   | 10      | Who generated the random allocation sequence, who enrolled participants, and who assigned participants to interventions                                                                     | 5<br>(reference 14) |
| Blinding                         | 11a     | If done, who was blinded after assignment to interventions (for example, participants, care providers, those assessing outcomes) and how                                                    | N/A                 |
|                                  | 11b     | If relevant, description of the similarity of interventions                                                                                                                                 | 5-6                 |

|                                                      |     |                                                                                                                                                   |                              |
|------------------------------------------------------|-----|---------------------------------------------------------------------------------------------------------------------------------------------------|------------------------------|
| Statistical methods                                  | 12a | Statistical methods used to compare groups for primary and secondary outcomes                                                                     | 7                            |
|                                                      | 12b | Methods for additional analyses, such as subgroup analyses and adjusted analyses                                                                  | 7                            |
| <b>Results</b>                                       |     |                                                                                                                                                   |                              |
| Participant flow (a diagram is strongly recommended) | 13a | For each group, the numbers of participants who were randomly assigned, received intended treatment, and were analyzed for the primary outcome    | 7                            |
|                                                      | 13b | For each group, losses and exclusions after randomization, together with reasons                                                                  | 7 +<br>Supplemental material |
| Recruitment                                          | 14a | Dates defining the periods of recruitment and follow-up                                                                                           |                              |
|                                                      | 14b | Why the trial ended or was stopped                                                                                                                | N/A                          |
| Baseline data                                        | 15  | A table showing baseline demographic and clinical characteristics for each group                                                                  | 17                           |
| Numbers analyzed                                     | 16  | For each group, number of participants (denominator) included in each analysis and whether the analysis was by original assigned groups           | 7                            |
| Outcomes and estimation                              | 17a | For each primary and secondary outcome, results for each group, and the estimated effect size and its precision (such as 95% confidence interval) | 8-9, 18-19                   |
|                                                      | 17b | For binary outcomes, presentation of both absolute and relative effect sizes is recommended                                                       | N/A                          |
| Ancillary analyses                                   | 18  | Results of any other analyses performed, including subgroup analyses and adjusted analyses, distinguishing pre-specified from exploratory         | Supplemental materials       |
| Harms                                                | 19  | All important harms or unintended effects in each group (for specific guidance see CONSORT for harms)                                             | N/A                          |
| <b>Discussion</b>                                    |     |                                                                                                                                                   |                              |
| Limitations                                          | 20  | Trial limitations, addressing sources of potential bias, imprecision, and, if relevant, multiplicity of analyses                                  | 12                           |
| Generalizability                                     | 21  | Generalizability (external validity, applicability) of the trial findings                                                                         | 12                           |
| Interpretation                                       | 22  | Interpretation consistent with results, balancing benefits and harms, and considering other relevant evidence                                     | 12-13                        |
| <b>Other information</b>                             |     |                                                                                                                                                   |                              |
| Registration                                         | 23  | Registration number and name of trial registry                                                                                                    | 2                            |
| Protocol                                             | 24  | Where the full trial protocol can be accessed, if available                                                                                       | 5                            |
| Funding                                              | 25  | Sources of funding and other support (such as supply of drugs), role of funders                                                                   | 1                            |
